# Supplementary material for: Comparison of influenza surveillance systems in Australia, China, Malaysia and expert recommendations for influenza control
Source: BMC Public Health. 2021 Sep 26;21:1750. doi: 10.1186/s12889-021-11765-x (PMC8466892; doi:10.1186/s12889-021-11765-x)
Supplement: Supplementary file 1 — Additional file 1. Influenza surveillance system overview in Australia, China and Malaysia. Overview and detailed assessment of each influenza surveillance sub-system across the 5 criteria and sub-criteria: 1. Non-medically attended community surveillance, 2. Virological surveillance, 3. Community surveillance, 4. Outbreak surveillance, 5. Primary care syndromic surveillance, 6. Hospital syndromic surveillance & 7. Mortality surveillance [file 12889_2021_11765_MOESM1_ESM.xlsx]

## Sheet: Overview
	Influenza surveillance system overview
			Australia	China	Malaysia
	Surveillance scope	Outcome	Department of Health	Chinese Center for Disease Control and Prevention	Malaysia Ministry of Health
	1. Non-medically attended community surveillance	1.1. ARI / ILI cases and/or incidence rates	Web-survey (Info.flutracking.Net) & medical hotline (Healthdirect)	None	None		Data available & published	Unpublished data	No data
		1.2. Proportion of ARI/ILI cases seeking care		None	None
	2. Virological surveillance	2.1. ARI / ILI specimens for virus typing & subtyping	Sentinel labs & 2 National Influenza Centres	Sentinel labs (NISN) & 1 National Influenza Center	2 National Influenza Centres
		2.2. ARI / ILI specimens for virus genome sequencing	1 WHO CC and H5 lab	1 WHO CC and H5 lab	None
		2.3. ARI / ILI specimens for antiviral drug resistance			None
	3. Community surveillance	3.1. Notified biologically/laboratory-confirmed cases	Sentinel labs, Mandatory disease notification (NNDSS)	Mandatory disease notification (NIDRS)	None
	4. Outbreak surveillance	4.1. ARI / ILI outbreaks in public settings	Outbreak monitoring in Australian states	ILI Outbreak in close settings (CPHEMIS)	Unpublished
		4.2. Biologically/laboratory-confirmed outbreaks in public settings
	5. Primary care syndromic surveillance	5.1. ARI / ILI GP visits and/or incidence rates	Sentinel GPs (ASPREN)	None	ILI sentinel clinics
		5.2. Biologically/laboratory-confirmed GP visits and/or incidence rates		None
		5.3. Associated excess GP visits	None	None	None
		5.4. Associated excess work loss cases	None	None	None
	6. Hospital syndromic surveillance	6.1. ILI or biologically/laboratory-confirmed emergency department visits	ILI Emergency Dpts (PHREDSS some states only - NSW)	ILI Emergency Dpts (NISN)	None
		6.2. SARI / ILI hospital admissions	SARI sentinel hospitals (FluCAN & APSU)	SARI sentinel hospitals scheme	SARI sentinel hospitals
		6.3. Biologically/laboratory-confirmed hospital admissions
		6.4. Associated excess hospital admissions	None	None	None
		6.5. Biologically/laboratory-confirmed ICU admissions	SARI sentinel hospitals (FluCAN & APSU)	SARI sentinel hospitals system	SARI sentinel hospitals
	7. Mortality surveillance	7.1. Diagnosed or biologically/ laboratory-confirmed deaths	Mandatory disease notification (NNDSS)	Mandatory disease notification (NIDRS)	None
		7.2. Associated excess deaths	Influenza & pneumonia (some states only - NSW)	None	None

## Sheet: 1.
	1. Non-medically attended Community Surveillance
			Australia		China	Malaysia
	Surveillance tools		Web-survey	Medical advice line	None	None
			Info.flutracking.net	Healthdirect hotline	NA	NA
	Outcome	1.1. ARI / ILI cases and/or incidence rates	Yes, ILI cases	Yes	N/A	N/A		Data available & published	Unpublished data	No data	No info	NA
		1.2. Proportion of ARI/ILI cases seeking care	Healthcare seeking behaviours + absenteeism	Yes
	Data granularity	Age group	<5, 5-17, 18-39, 40-64, 65+	Consolidated
		Gender	No	No
		Risk condition	No	No
		Location	Yes, per state	No
		Virology	NA	NA
		Severity (symptoms, complications)	3 items (Consolidated)	No
		Treatment	No	No
		Vaccination status	Yes	No
	Timing	Frequency	Weekly	Weekly
		Time period	W18-W43	W11-W43
	Representa-tiveness	Geographical representativeness	National	National
		Population representativeness	~250 / 100k	No info
		Number respondent	~60k participants	NA
	Sampling strategy	Surveillance type	Self-reported syndromic surveillance	Remote health advice syndromic surveillance
		Testing status	No	No
	Data communication	In annual report	Yes	Yes
		In weekly report	Yes	Yes
		Delay in release (if any)	No	No
		Data can be extracted	Yes	No

## Sheet: 2.
	2. Virological surveillance
			Australia		China		Malaysia
	Surveillance tools		Sentinel labs	WHO CC network	Sentinel labs	WHO CC network	WHO NIC network
			Sentinel Labs & 2 NIC	1 WHO CC & H5 lab	NISN Sentinel labs	1 WHO CC & H5 lab	2 NIC
	Outcome	2.1. ARI / ILI specimens for virus typing & subtyping	Yes	Yes	Yes	Yes	Yes		Data available & published	Unpublished data	No data	No info	NA
		2.2. ARI / ILI specimens for virus genome sequencing	No	Yes	No	Yes	No
		2.3. ARI / ILI specimens for antiviral drug resistance	No	Yes	No	Yes	No
	Granularity	Age group	Consolidated	Consolidated	Consolidated	Consolidated	Consolidated
		Gender	No	No	No	No	No
		Risk condition	No	No	No	No	No
		Location	Yes, per state	No	Yes, per province	No	No
		Virology	Flu virus type & subtype, other viruses	Flu virus type & subtype	Flu virus type & subtype	Flu virus type & subtype, other viruses	Flu virus type & subtype
		Severity (symptoms, complications)	No	No	No	No	No
		Treatment	No	No	No	No	No
		Vaccination status	No	No	No	No	No
	Timing	Frequency	Bi-weekly	Weekly	Weekly	Weekly	Weekly
		Time period	All year long	All year long	All year long	All year long	All year long
	Representa-tiveness	Geographical representativeness	5 states	National	National	National	National
		Type of facilities	5 Laboratories	1 WHO CC Laboratory	408 Laboratories	1 WHO CC Laboratory	2 NIC Laboratories
		Proportion of facilities	No info	No info	No info	No info	No info
	Sampling strategy	Surveillance type	Active sentinel surveillance	Active sentinel surveillance	Active sentinel surveillance	Active sentinel surveillance	Active sentinel surveillance
		Sample collection	No info	No info	No info	No info	No info
		Test type	RT-PCR	RT-PCR	RT-PCR	RT-PCR	RT-PCR
	Data communication	In annual report	No	No	No	No	No
		In weekly report	Yes	Yes	Yes	Yes	Yes
		Delay in release	No	No	No	No	No
		Data can be extracted	No	Yes	No	Yes	Yes

## Sheet: 3.
	3. Community surveillance
			Australia	China	Malaysia
	Surveillance tools		Mandatory disease notification	Mandatory disease notification	Mandatory disease notification
			National Notifiable Diseases Surveillance System (NNDSS)	National Influenza Disease reporting System (NIDRS)	NA
	Ouctome	3.1. Notified biologically/laboratory-confirmed cases	Yes	Yes	Yes		Data available & published	Unpublished data	No data	No info	NA
	Granularity	Age group	Yes, per 5 year age group	Every year 1-10y Every 5y, 10-80+	Unpublished
		Gender	No	Yes
		Risk condition	No	No
		Location	Yes, per state	Yes, per province
		Virology	Flu virus type & subtype, other viruses	No
		Severity (symptoms, complications)	Yes, death	Yes, death
		Treatment	No	No
		Vaccination status	No	No
	Timing	Frequency	Bi-weekly	Daily
		Time period	All year long	All year long
	Representa-tiveness	Geographical representativeness	National	National
		Type of facilities	No info	No info
		Proportion of facilities	All, mandatory	All, mandatory
	Sampling strategy	Surveillance type	Mandatory notification	Mandatory notification
		Sample collection	No info	No info
		Test type	RT-PCR	RT-PCR
	Data communication	In annual report	No	Yes
		In weekly report	Yes	Monthly
		Delay in release	No	No
		Data can be extracted	No	Yes

## Sheet: 4.
	4. Outbreak surveillance
			Australia	China	Malaysia
	Surveillance sub-systems		Public setting outbreak monitoring	Public setting outbreak monitoring	Public setting outbreak monitoring
			Outbreak surveillance in Australian states	China Public Health Emergency Management Information System (CPHEMIS)	NA
	Outcome	4.1. ARI / ILI outbreaks in close settings	Yes	No	Unpublished		Data available & published	Unpublished data	No data	No info	NA
		4.2. Biologically/laboratory-confirmed outbreaks in close settings	Yes	Yes
	Granularity	Age group	65+	No
		Gender	No	No
		Risk condition	Yes	No
		Location	Yes, per state	Yes, North vs South
		Virology	Virus type & sub type	Virus type & subtype
		Severity (symptoms, complications)	No	No
		Treatment	No	No
		Vaccination status	No	No
	Timing	Frequency	Monthly	Weekly
		Time period	Flu season	All year long
	Representa-tiveness	Geographical representativeness	State level	National
		Type of facilities	Ad-hoc, depending on facility	Primary, secondary, nursery schools
		Proportion of facilities	All in theory	All in theory
	Sampling strategy	Surveillance type	Mandatory notification	Mandatory notification
		Sample collection	No info	No info
		Test type	RT-PCR	Rapid PoC / RT-PCR
	Data communication	In annual report	No	No
		In weekly report	Yes	Yes
		Delay in release	No	No
		Data can be extracted	Yes	Yes

## Sheet: 5.
	5. Primary care syndromic surveillance
			Australia	China	Malaysia
	Surveillance tools		Sentinel GP	Sentinel GP	Sentinel GP
			Australian Sentinel Practices Research Network (ASPREN)	NA	Sentinel ILI Clinics
	Outcome	5.1. ARI / ILI GP visits and/or incidence rates	Yes	No	Yes		Data available & published	Unpublished data	No data	No info	NA
		5.2. Biologically/laboratory-confirmed GP visits and/or incidence rates	Yes	No	Yes
		5.3. Influenza-associated excess GP visits	No	No	No
		5.4. Influenza-associated excess work loss cases	No	No	No
	Data granularity	Age group	Consolidated	None	Unpublished
		Gender	No		Unpublished
		Risk condition	No		No info
		Location	Yes, per state		No info
		Virology	Flu Virus type & sub type & others viruses		Unpublished
		Severity (symptoms, complications)	No		Unpublished
		Treatment	No		Unpublished
		Vaccination status	No		No
	Timing	Frequency	Weekly		Weekly
		Time period	All year long		All year long
	Representa-tiveness	Geographical representativeness	National		National
		Population representativeness	~2.3%		No info
		Number of settings	562 GPs		15 clinics
		Proportion of Facilities	No info		No info
	Sampling strategy	Surveillance Type	Acive sentinel surveillance		Acive sentinel surveillance
		ARI / ILI Definition	ILI		ILI
		Sample collection	All ILI 65+ & 3 1st ILI below 65yo per site		5 samples per week per site
		Test type	RT-PCR		RT-PCR
	Data communication	In annual report	Yes		No
		In weekly report	Yes		No
		Delay in release	No		4-5 weeks (WHO)
		Data can be extracted	Yes		Yes (WHO website)

## Sheet: 6.
	6. Hospital syndromic surveillance
			Australia			China		Malaysia
	Surveillance tools		Sentinel EDs	Sentinel Hospitals	Sentinel Peads	ILI sentinel hospitals	SARI Sentinel Hospitals	SARI Sentinel Hospitals
			Public Health Rapid, Emergency, Disease and Syndromic Surveillance (PHREDSS)	Influenza Complications Alert Network (FluCAN)	Australian Paediatric Surveillance Unit (APSU)	National Influenza Surveillance System (NISN)	SARI Sentinel Hospitals	SARI Sentinel Hospitals
	Outcome	6.1. ILI or biologically/laboratory-confirmed Emergency Department visits	Yes	No	Yes	Yes	No	No		Data available & published	Unpublished data	No data	No info	NA
		6.2. SARI / ILI hospital admissions	No	Yes	Yes	No	Yes	No
		6.3. Biologically/laboratory-confirmed hospital admissions	No	Yes	Yes	No	Yes	No
		6.4. Influenza-associated excess hospital admissions	No	No	No	No	No	No
		6.5. Biologically/laboratory-confirmed ICU admissions	No	Yes	Yes	No	Yes	Yes
	Data granularity	Age group	Yes, but unpublished	0-14, 15-64, 65+	Yes, focus below 15 yo, but unpublished	0-4, 5-14, 14-25, 25-59, 60+ but unpublished	0-4, 5-14, 14-25, 25-59, 60+ but unpublished	<13, 13+, but unpublished
		Gender	No	No	No	No	No	No
		Risk condition	Yes, but unpublished	Consolidated	Yes, but unpublished	No	Yes, but unpublished	No
		Virology	Yes, but unpublished	Virus type & sub type	Yes, but unpublished	Virus type & sub type	Virus type & sub type	Virus type & sub type
		Severity (symptoms, complications)	Yes, but unpublished	Proportion sent to ICU	Complications of influenza	No	Yes, but unpublished	No
		Treatment	No	No	No	No	No	No
		Vaccination status	No	No	Yes, but unpublished	No	Yes, but unpublished	No
	Timing	Frequency	Weekly	Bi-weekly	Monthly	Weekly	Weekly	Weekly
		Time period	All year long	W21-W42	July - Sept	All year long	All year long	All year long
	Representa-tiveness	Geographical representativeness	Some states only	National	National	National	National	National
		Population representativeness	No info	No info	No info	No info	No info	No info
		Number of settings	60 Emergency Dpts	21 hospitals	1,500 peads	554 hospitals	25 hospitals	8 hospitals
	Sampling strategy	Surveillance Type	Active sentinel surveillance	Active sentinel surveillance	Active sentinel surveillance	Active sentinel surveillance	Active sentinel surveillance	Active sentinel surveillance
		SARI / ILI Definition	ILI	SARI	SARI	ILI	SARI	SARI
		Sample collection	No info	No info	No info	20 samples per week per site on average	No info	5 per week
		Test type	RT-PRC	RT-PCR	RT-PCR	RT-PCR	RT-PCR	RT-PCR
	Data communication	In annual report	No	No	No	Monthly	No	No
		In weekly report	Yes	Yes	No	Yes	No	No
		Delay in release	No	No	No info	No	No info	4-5 weeks
		Data can be extracted	No	No	No	No	No	No

## Sheet: 7.
	7. Mortality surveillance
			Australia		China		Malaysia
	Surveillance tools		Mandatory disease notification	Excess mortality modelling	Mandatory disease notification	Excess mortality modelling	Hospital lab-confirmed mortality	Excess mortality modelling
			National Notifiable Diseases Surveillance System (NNDSS)	Pneumonia & influenza mortality (NSW only)	National Infectious Disease Reporting System (NIDRS)	NA	NA	NA
	Outcome	7.1. Diagnosed or biologically/laboratory-confirmed deaths	Yes	No	Yes	No	No or unpublished	No		Data available & published	Unpublished data	No data	No info	NA
		7.2. Influenza-associated excess deaths	No	Yes	No	No	No	No
	Data granularity	Age group	Every 5 year	No	Every year 1-10y Every 5y, 10-80+	No regular nationwide excess mortality surveillance, only studies (Li X et al 2019)	None or unpublished	No regular nationwide excess mortality surveillance
		Gender	No	No	Yes
		Risk condition	Consolidated	No	No
		Location	Yes, per state	No	Yes, per province
		Virology	Virus type & sub type	NA	No
		Severity (symptoms, complications)	No	NA	No
		Treatment	No	NA	No
		Vaccination status	No	NA	No
	Timing	Frequency	Bi-weekly	Weekly	Daily
		Time period	W21-W42	All year round	All year round
	Representa-tiveness	Geographical representativeness	National	New South Wales	National
		Population representativeness	~12%	No info	No info
		Number of settings	17	No info	No info
		Proportion of facilities	No info	No info	No info
	Sampling strategy	Surveillance Type	Mandatory disease notification	Flu & pneumonia death certificates	Mandatory disease notification
		Sample collection	No info	NA	No info
		Test type	RT-PCR	NA	Clinical diagnosis / Rapid PoC / RT-PCR
	Data communication	In annual report	Yes	Yes	Monthly
		In weekly report	Yes	Yes	None
		Delay in release	No	Yes, 1-2 weeks	No info
		Data can be extracted	Yes	No	Yes
